# Supplementary material
Source: PubMed Central journal article supplement (PMC3256858)

# Supplementary Figure 1.

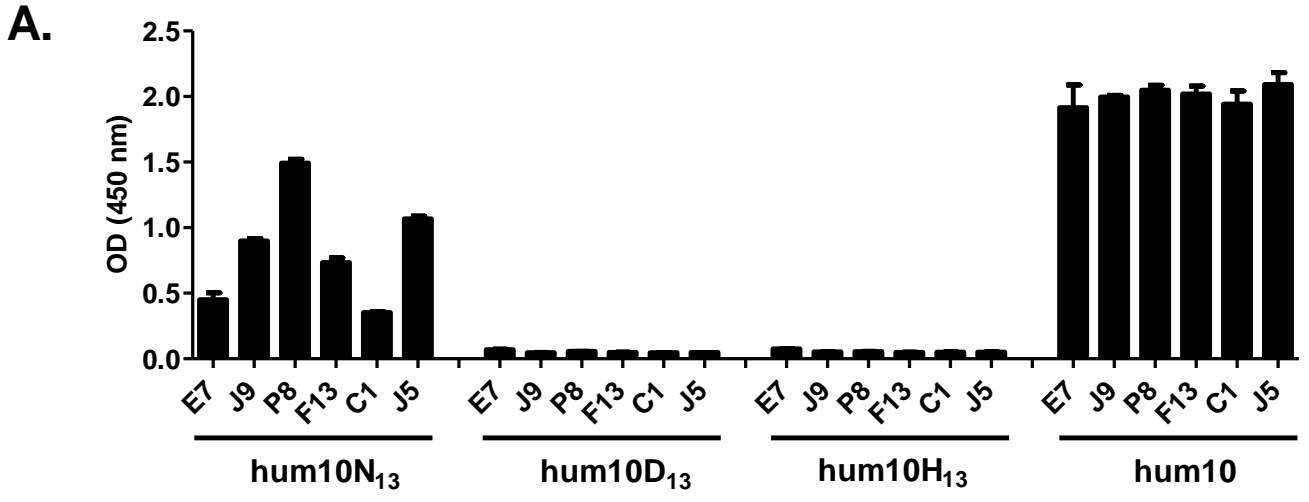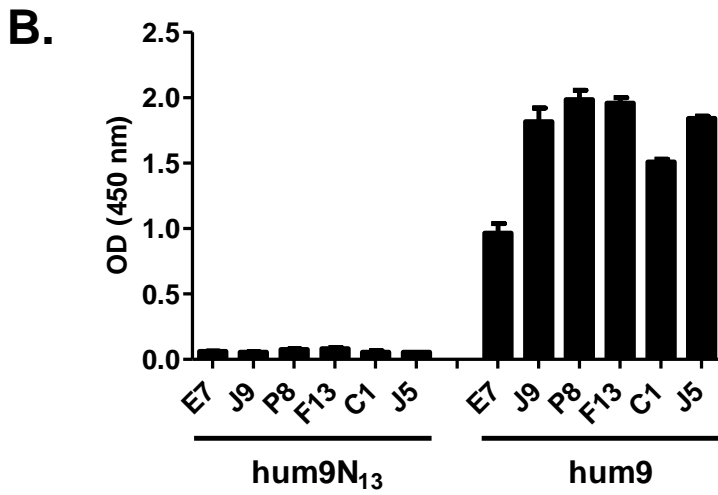

Supplement: supp_M111.253658_supplementary.pdf [file supp_M111.253658_supplementary.pdf]
